# Supplementary material for: Dissipation and Residue of Metalaxyl-M and Azoxystrobin in Scallions and Cumulative Risk Assessment of Dietary Exposure to Hepatotoxicity
Source: MDPI journal article supplement (doi:10.3390/molecules27185822), 2022-09-08
Supplement: s1 [file s1]

# Dissipation and Residue of Metalaxyl-M and Azoxystrobin in Scallions and Cumulative Risk Assessment of Dietary Exposure to Hepatotoxicity

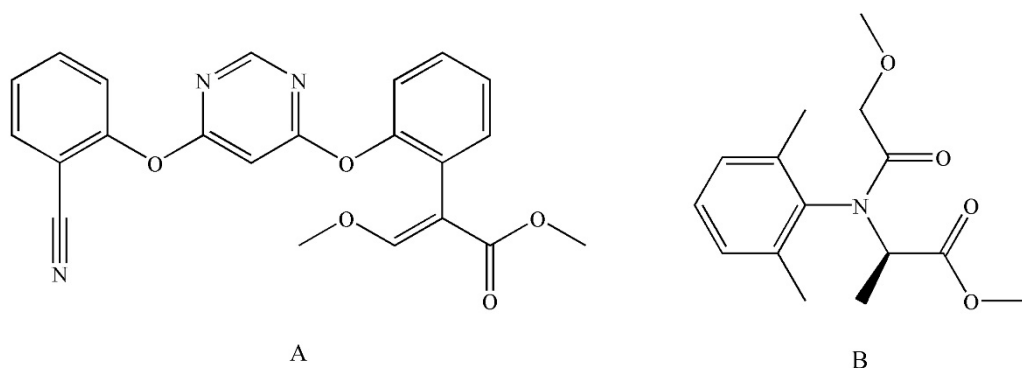

**Figure S1.** Structures of metalaxyl-M and azoxystrobin: (A) metalaxyl-M, (B) azoxystrobin .

**Table S1.** Gradient elution procedure.

| t/min | Flow rate (mL/min) | Acetonitrile (%) | 0.1% Formic acid aqueous solution (%) |
|-------|--------------------|------------------|---------------------------------------|
| 0     | 0.30               | 10.0             | 90.0                                  |
| 0.5   | 0.30               | 10.0             | 90.0                                  |
| 1.5   | 0.30               | 90.0             | 10.0                                  |
| 3.5   | 0.30               | 90.0             | 10.0                                  |
| 3.6   | 0.30               | 10.0             | 90.0                                  |
| 5.0   | 0.30               | 10.0             | 90.0                                  |

**Table S2.** Experimental parameters and chromatographic conditions of metalaxyl-M and azoxystrobin.

| Compound     | Molecular formula                                             | Precursor ion (m/z) | RT (min) | Ion source | Fragmentor Voltage (V) | Quantification ion transition (m/z) | CE1 (eV) | Qualification ion transition (m/z) | CE2 (eV) |
|--------------|---------------------------------------------------------------|---------------------|----------|------------|------------------------|-------------------------------------|----------|------------------------------------|----------|
| Metalaxyl-M  | C <sub>15</sub> H <sub>21</sub> NO <sub>4</sub>               | 280.2               | 2.047    | ESI+       | 105                    | 280.2/220.0                         | 12       | 280.2/192.0                        | 18       |
| Azoxystrobin | C <sub>22</sub> H <sub>17</sub> N <sub>3</sub> O <sub>5</sub> | 404.1               | 2.157    | ESI+       | 115                    | 404.1/372.1                         | 12       | 404.1/344.1                        | 26       |

RT, retention time; CE, collision energy.

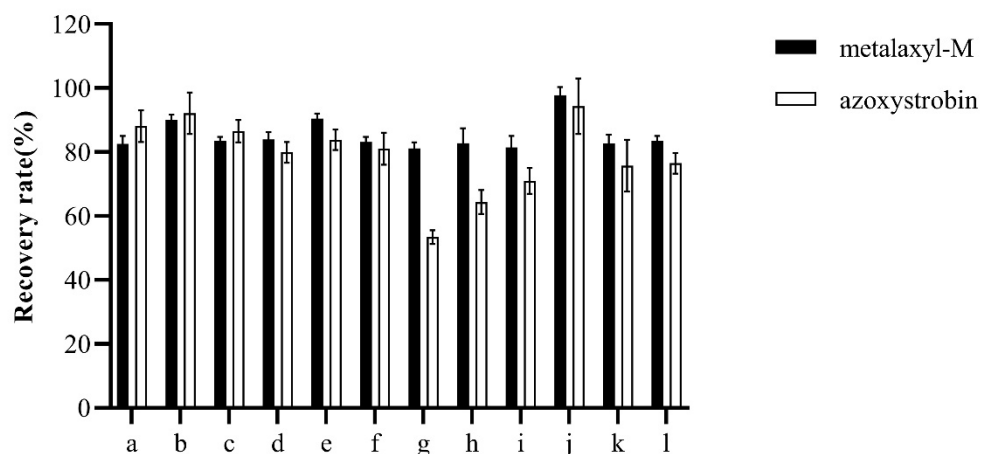

**Figure S2.** Recovery of different modified QuEChERS purification conditions for tar-gets in scallion matrix at the level of 0.002 mg/kg (n=5): (a) 50 mg primary secondary amine (PSA), (b) 50 mg octadecylsilane (C18), (c) 50 mg graphitized carbon black (GCB), (d) 25 mg PSA with 150 mg MgSO<sub>4</sub>, (e) 50 mg PSA with 150 mg MgSO<sub>4</sub>, (f) 25 mg C18 with 150 mg MgSO<sub>4</sub>, (g) 50 mg C18 with 150 mg MgSO<sub>4</sub>, (h) 25 mg GCB with 150 mg MgSO<sub>4</sub>, (i) 50 mg GCB with 150 mg MgSO<sub>4</sub>, (j) 50 mg PSA + 50 mg C18 with 150 mg MgSO<sub>4</sub>, (k) 50 mg PSA + 50 mg C18 + 50 mg GCB with 150 mg MgSO<sub>4</sub>, and (l) blank.

**Table S3.** Recoveries of metalaxyl-M and azoxystrobin in scallions (n = 5).

| Compound     | Spiked level (mg/kg) | Average recoveries (%) | RSD (%) |
|--------------|----------------------|------------------------|---------|
| Metalaxyl-M  | 0.001                | 103.68                 | 3.95    |
|              | 0.01                 | 97.66                  | 2.11    |
|              | 1                    | 101.53                 | 4.89    |
|              | 7                    | 106.27                 | 6.88    |
| Azoxystrobin | 0.001                | 101.38                 | 12.64   |
|              | 0.01                 | 88.82                  | 10.49   |
|              | 1                    | 100.15                 | 6.51    |
|              | 7                    | 105.19                 | 5.30    |

**Table S4.** Cumulative dietary risk assessment of metalaxyl-M and azoxystrobin for male.

|                 |       | Urban                                 |        |                                       |        |        | Rural                                 |        |                                       |        |        |
|-----------------|-------|---------------------------------------|--------|---------------------------------------|--------|--------|---------------------------------------|--------|---------------------------------------|--------|--------|
| Peren-<br>tiles |       | Lower Limit of<br>Confidence Interval |        | Upper Limit of<br>Confidence Interval |        | Mean   | Lower Limit of<br>Confidence Interval |        | Upper Limit of<br>Confidence Interval |        | Mean   |
|                 |       | 50%                                   | 95%    | 50%                                   | 95%    |        | 50%                                   | 95%    | 50%                                   | 95%    |        |
| 2-3<br>years    | P90   | 23.62%                                | 22.99% | 24.34%                                | 24.99% | 23.98% | 23.59%                                | 22.92% | 24.24%                                | 24.92% | 23.90% |
|                 | P97.5 | 34.49%                                | 33.13% | 36.06%                                | 37.82% | 35.34% | 34.50%                                | 32.96% | 35.99%                                | 37.68% | 35.27% |
|                 | P99.9 | 60.12%                                | 54.33% | 70.23%                                | 86.33% | 66.23% | 60.84%                                | 53.44% | 69.87%                                | 83.29% | 65.68% |
| 4-6<br>years    | P90   | 16.73%                                | 16.29% | 17.22%                                | 17.70% | 16.97% | 23.98%                                | 23.33% | 24.70%                                | 25.46% | 24.34% |
|                 | P97.5 | 24.47%                                | 23.33% | 25.56%                                | 26.67% | 25.00% | 35.23%                                | 33.54% | 36.85%                                | 38.60% | 36.01% |
|                 | P99.9 | 42.63%                                | 37.85% | 49.42%                                | 58.36% | 46.29% | 61.40%                                | 54.73% | 70.96%                                | 84.54% | 66.75% |
| 7-10<br>years   | P90   | 15.66%                                | 15.26% | 16.18%                                | 16.62% | 15.92% | 19.78%                                | 19.26% | 20.36%                                | 21.04% | 20.08% |
|                 | P97.5 | 22.90%                                | 21.90% | 24.03%                                | 25.04% | 23.47% | 29.02%                                | 27.76% | 30.41%                                | 32.04% | 29.73% |
|                 | P99.9 | 40.04%                                | 35.77% | 46.54%                                | 54.85% | 43.57% | 51.15%                                | 45.55% | 59.81%                                | 70.77% | 55.98% |
| 11-13<br>years  | P90   | 12.31%                                | 11.99% | 12.69%                                | 13.07% | 12.50% | 15.32%                                | 14.94% | 15.82%                                | 16.30% | 15.58% |
|                 | P97.5 | 17.95%                                | 17.21% | 18.85%                                | 19.74% | 18.39% | 22.57%                                | 21.67% | 23.57%                                | 24.68% | 23.08% |
|                 | P99.9 | 31.39%                                | 27.66% | 35.70%                                | 42.83% | 33.84% | 39.78%                                | 35.57% | 46.03%                                | 54.27% | 43.20% |
| 14-17<br>years  | P90   | 10.68%                                | 10.42% | 10.97%                                | 11.27% | 10.83% | 12.16%                                | 11.81% | 12.57%                                | 12.91% | 12.36% |
|                 | P97.5 | 15.57%                                | 14.98% | 16.30%                                | 17.06% | 15.94% | 17.88%                                | 17.16% | 18.80%                                | 19.53% | 18.35% |
|                 | P99.9 | 27.30%                                | 24.29% | 31.17%                                | 36.66% | 29.46% | 31.70%                                | 28.84% | 36.62%                                | 41.75% | 34.26% |

|                |       |        |        |        |        |        |        |        |        |        |        |
|----------------|-------|--------|--------|--------|--------|--------|--------|--------|--------|--------|--------|
| 18-29<br>years | P90   | 9.05%  | 8.79%  | 9.32%  | 9.56%  | 9.18%  | 11.37% | 11.06% | 11.72% | 12.02% | 11.55% |
|                | P97.5 | 13.21% | 12.67% | 13.93% | 14.44% | 13.57% | 16.71% | 16.02% | 17.54% | 18.27% | 17.11% |
|                | P99.9 | 23.13% | 20.68% | 26.60% | 31.64% | 25.02% | 29.49% | 25.98% | 33.80% | 40.87% | 31.94% |
| 30-44<br>years | P90   | 8.64%  | 8.38%  | 8.89%  | 9.15%  | 8.76%  | 10.56% | 10.27% | 10.88% | 11.21% | 10.72% |
|                | P97.5 | 12.61% | 12.13% | 13.27% | 13.94% | 12.95% | 15.55% | 14.91% | 16.30% | 17.10% | 15.94% |
|                | P99.9 | 22.20% | 19.80% | 25.60% | 30.44% | 24.06% | 27.51% | 24.57% | 31.95% | 37.46% | 30.02% |
| 45-59<br>years | P90   | 9.03%  | 8.74%  | 9.29%  | 9.53%  | 9.15%  | 10.78% | 10.47% | 11.15% | 11.51% | 10.97% |
|                | P97.5 | 13.25% | 12.68% | 13.81% | 14.58% | 13.55% | 15.94% | 15.26% | 16.80% | 17.74% | 16.39% |
|                | P99.9 | 23.20% | 21.10% | 26.91% | 32.26% | 25.33% | 28.68% | 25.27% | 33.55% | 39.91% | 31.24% |
| 60-69<br>years | P90   | 8.99%  | 8.76%  | 9.24%  | 9.50%  | 9.12%  | 10.66% | 10.37% | 10.94% | 11.24% | 10.79% |
|                | P97.5 | 13.19% | 12.66% | 13.81% | 14.39% | 13.50% | 15.72% | 15.16% | 16.46% | 17.17% | 16.10% |
|                | P99.9 | 23.12% | 20.75% | 26.69% | 32.28% | 25.17% | 27.89% | 24.84% | 32.01% | 38.44% | 30.24% |
| ≥70<br>years   | P90   | 9.20%  | 8.97%  | 9.47%  | 9.75%  | 9.34%  | 10.07% | 9.78%  | 10.36% | 10.69% | 10.22% |
|                | P97.5 | 13.52% | 12.93% | 14.14% | 15.02% | 13.84% | 14.93% | 14.33% | 15.62% | 16.44% | 15.29% |
|                | P99.9 | 23.92% | 21.26% | 27.83% | 33.19% | 25.98% | 26.72% | 23.94% | 31.40% | 37.08% | 29.24% |

**Table S5.** Cumulative dietary risk assessment of metalaxyl-M and azoxystrobin for female.

| Age            | Percen-<br>tiles | Urban               |                     |                     |                     | Rural  |                     |                     |                     |                     |        |
|----------------|------------------|---------------------|---------------------|---------------------|---------------------|--------|---------------------|---------------------|---------------------|---------------------|--------|
|                |                  | Lower Limit of      |                     | Upper Limit of      |                     | Mean   | Lower Limit of      |                     | Upper Limit of      |                     | Mean   |
|                |                  | Confidence Interval | Confidence Interval | Confidence Interval | Confidence Interval |        | Confidence Interval | Confidence Interval | Confidence Interval | Confidence Interval |        |
|                |                  | 50%                 | 95%                 | 50%                 | 95%                 |        | 50%                 | 95%                 | 50%                 | 95%                 |        |
| 2-3<br>years   | P90              | 19.35%              | 18.75%              | 19.90%              | 20.68%              | 19.64% | 25.74%              | 25.13%              | 26.53%              | 27.35%              | 26.16% |
|                | P97.5            | 28.28%              | 26.97%              | 29.69%              | 31.01%              | 28.97% | 37.66%              | 36.10%              | 39.40%              | 41.25%              | 38.58% |
|                | P99.9            | 49.67%              | 44.45%              | 56.06%              | 64.68%              | 53.14% | 66.15%              | 58.23%              | 76.40%              | 90.68%              | 71.60% |
| 4-6<br>years   | P90              | 18.72%              | 18.26%              | 19.30%              | 19.85%              | 19.01% | 24.53%              | 23.86%              | 25.24%              | 25.95%              | 24.88% |
|                | P97.5            | 27.46%              | 26.43%              | 28.61%              | 30.05%              | 28.05% | 35.83%              | 34.53%              | 37.54%              | 39.26%              | 36.73% |
|                | P99.9            | 48.01%              | 43.27%              | 55.00%              | 66.55%              | 52.06% | 63.31%              | 56.94%              | 73.06%              | 84.79%              | 68.68% |
| 7-10<br>years  | P90              | 16.75%              | 16.22%              | 17.25%              | 17.74%              | 16.99% | 19.44%              | 18.86%              | 19.97%              | 20.50%              | 19.69% |
|                | P97.5            | 24.48%              | 23.44%              | 25.63%              | 26.77%              | 25.06% | 28.46%              | 27.38%              | 29.71%              | 31.11%              | 29.09% |
|                | P99.9            | 42.61%              | 38.21%              | 49.40%              | 57.29%              | 46.11% | 50.42%              | 44.37%              | 58.64%              | 67.36%              | 54.66% |
| 11-13<br>years | P90              | 11.77%              | 11.47%              | 12.11%              | 12.47%              | 11.94% | 14.61%              | 14.16%              | 15.03%              | 15.43%              | 14.81% |
|                | P97.5            | 17.17%              | 16.51%              | 18.01%              | 18.77%              | 17.60% | 21.41%              | 20.60%              | 22.49%              | 23.57%              | 21.97% |
|                | P99.9            | 30.24%              | 27.19%              | 34.76%              | 42.56%              | 32.92% | 37.81%              | 33.84%              | 43.49%              | 51.16%              | 40.87% |
| 14-17<br>years | P90              | 11.03%              | 10.75%              | 11.37%              | 11.69%              | 11.21% | 12.05%              | 11.73%              | 12.41%              | 12.80%              | 12.23% |
|                | P97.5            | 16.13%              | 15.48%              | 16.92%              | 17.74%              | 16.54% | 17.68%              | 17.01%              | 18.56%              | 19.42%              | 18.14% |
|                | P99.9            | 28.23%              | 24.93%              | 32.93%              | 39.00%              | 30.75% | 31.07%              | 27.76%              | 36.30%              | 42.97%              | 33.97% |
| 18-29<br>years | P90              | 10.69%              | 10.38%              | 11.03%              | 11.28%              | 10.86% | 11.97%              | 11.67%              | 12.29%              | 12.75%              | 12.14% |
|                | P97.5            | 15.68%              | 15.08%              | 16.38%              | 17.06%              | 16.03% | 17.57%              | 16.88%              | 18.41%              | 19.44%              | 18.03% |
|                | P99.9            | 27.18%              | 24.06%              | 31.34%              | 38.22%              | 29.58% | 31.34%              | 27.78%              | 35.90%              | 41.91%              | 33.81% |
| 30-44<br>years | P90              | 10.04%              | 9.78%               | 10.33%              | 10.66%              | 10.19% | 11.44%              | 11.09%              | 11.80%              | 12.19%              | 11.63% |
|                | P97.5            | 14.72%              | 14.03%              | 15.44%              | 16.14%              | 15.07% | 16.86%              | 16.15%              | 17.60%              | 18.64%              | 17.24% |
|                | P99.9            | 25.89%              | 22.53%              | 29.76%              | 36.64%              | 28.02% | 30.05%              | 26.44%              | 34.22%              | 39.70%              | 32.23% |
| 45-59<br>years | P90              | 9.81%               | 9.56%               | 10.09%              | 10.41%              | 9.95%  | 11.25%              | 10.94%              | 11.60%              | 11.98%              | 11.42% |
|                | P97.5            | 14.38%              | 13.82%              | 15.07%              | 15.84%              | 14.73% | 16.68%              | 16.00%              | 17.46%              | 18.32%              | 17.07% |
|                | P99.9            | 25.30%              | 22.55%              | 29.28%              | 33.86%              | 27.46% | 29.58%              | 26.94%              | 34.03%              | 40.69%              | 32.03% |
| 60-69<br>years | P90              | 9.59%               | 9.36%               | 9.93%               | 10.25%              | 9.77%  | 11.16%              | 10.83%              | 11.50%              | 11.87%              | 11.33% |
|                | P97.5            | 14.12%              | 13.55%              | 14.85%              | 15.46%              | 14.48% | 16.54%              | 15.87%              | 17.30%              | 18.17%              | 16.94% |
|                | P99.9            | 24.93%              | 22.59%              | 29.02%              | 33.88%              | 27.22% | 29.33%              | 26.16%              | 34.60%              | 40.45%              | 32.16% |
| ≥70<br>years   | P90              | 8.94%               | 8.75%               | 9.21%               | 9.50%               | 9.08%  | 10.00%              | 9.70%               | 10.34%              | 10.66%              | 10.17% |
|                | P97.5            | 13.09%              | 12.56%              | 13.74%              | 14.41%              | 13.42% | 14.87%              | 14.18%              | 15.58%              | 16.34%              | 15.22% |
|                | P99.9            | 22.80%              | 20.78%              | 26.47%              | 30.96%              | 24.84% | 26.78%              | 23.53%              | 30.82%              | 36.01%              | 28.89% |

**Table S6.** Contribution distribution of dietary risks faced by different population groups.

| Component             | 2-3 years old |        |        |        | 30-44 years old |        |        |        | 60-69 years old |        |        |        |
|-----------------------|---------------|--------|--------|--------|-----------------|--------|--------|--------|-----------------|--------|--------|--------|
|                       | urban         |        | rural  |        | urban           |        | rural  |        | urban           |        | rural  |        |
|                       | male          | female | male   | female | male            | female | male   | female | male            | female | male   | female |
| Metalaxyl-M           | 15.42%        | 17.47% | 17.41% | 17.81% | 19.46%          | 17.72% | 23.78% | 22.33% | 18.15%          | 16.78% | 22.05% | 21.84% |
| Azoxystrobin          | 84.58%        | 82.53% | 82.59% | 82.19% | 80.54%          | 82.28% | 76.22% | 77.67% | 81.85%          | 83.22% | 77.95% | 78.16% |
| Rice and products     | 6.66%         | 6.53%  | 7.18%  | 7.34%  | 8.06%           | 6.67%  | 8.63%  | 8.04%  | 6.47%           | 5.81%  | 8.06%  | 7.82%  |
| Flour and products    | 1.64%         | 1.93%  | 2.18%  | 1.65%  | 2.53%           | 2.02%  | 2.73%  | 2.33%  | 2.25%           | 2.10%  | 2.62%  | 2.21%  |
| Other cereals         | 0.20%         | 0.21%  | 0.20%  | 0.16%  | 0.12%           | 0.10%  | 0.25%  | 0.23%  | 0.17%           | 0.16%  | 0.30%  | 0.28%  |
| Potatoes and products | 0.26%         | 0.32%  | 0.68%  | 0.71%  | 0.42%           | 0.36%  | 0.74%  | 0.73%  | 0.35%           | 0.38%  | 0.69%  | 0.71%  |
| Legumes and products  | 0.66%         | 0.62%  | 0.70%  | 0.65%  | 0.78%           | 0.67%  | 0.84%  | 0.73%  | 0.81%           | 0.75%  | 0.84%  | 0.85%  |
| Dark vegetables       | 28.79%        | 26.64% | 34.87% | 33.01% | 36.56%          | 34.71% | 37.68% | 38.56% | 37.78%          | 37.73% | 41.79% | 43.05% |
| Light vegetables      | 24.15%        | 27.01% | 26.30% | 26.27% | 29.10%          | 26.59% | 34.85% | 33.85% | 27.04%          | 25.08% | 33.23% | 32.93% |
| Fruits                | 32.95%        | 31.51% | 24.03% | 26.51% | 16.36%          | 23.64% | 9.22%  | 11.10% | 19.41%          | 22.28% | 7.81%  | 7.96%  |
| Vegetable oil         | 0.63%         | 0.78%  | 0.44%  | 0.40%  | 0.72%           | 0.62%  | 0.59%  | 0.50%  | 0.69%           | 0.70%  | 0.54%  | 0.52%  |
| Soy sauce             | 4.05%         | 4.47%  | 3.41%  | 3.29%  | 5.35%           | 4.60%  | 4.46%  | 3.93%  | 5.03%           | 5.01%  | 4.10%  | 3.67%  |
